# Supplementary material for: EGFR and MET Amplifications Determine Response to HER2 Inhibition in ERBB2 -Amplified Esophagogastric Cancer
Source: Oxford University Press journal article supplement (doi:10.1158/2159-8290.cd-18-0598), 2018-11-21
Supplement: 21598290cd180598-sup-198538_2_supp_5137828_phj85m.xlsx [file 21598290cd180598-sup-198538_2_supp_5137828_phj85m.xlsx]

## Sheet: List of supplementary tables
Supplementary Tables for "EGFR and MET Amplifications Determine Response to HER2 Inhibition in ERBB2-Amplified Esophagogastric Cancer"
Supplementary Table 1: Evidence of HER2 status at diagnosis
Supplementary Table 2: Drug-related adverse events occurring in patients grouped by preferred term and by highest CTCAE grade
Supplementary Table 3: Master Patient Table
Supplementary Table 4: Baseline patient characteristics of the patients enrolled in phase 2 study.
Supplementary Table 5: Additional treatment information
Supplementary Table 6: Detailed copy number levels for EGFR and ERBB2
Supplementary Table 7: Radiographic tumor assessment on 89Zr-trastuzumab PET and conventional CT scam
Supplementary Table 8: Targeted mass spectrometry (SRM-MS) analysis of tumor samples from patient P-0000413
Supplementary Table 9: Serial cfDNA results for Patient 28 (P-0000282)
Supplementary Table 10: Genes included on MSK-IMPACT platform

## Sheet: Table S1. HER2 at diagnosis
			Pre-trastuzumab			Post-tras/Pre-Afatinib
ID_in_manuscript	Patient_ID	IHC	FISH	IMPACT	IHC	FISH	IMPACT
Patient 1	YJ-her-012	3+		ERBB2 AMP*			ERBB2 AMP
Patient 2	P-0003983	3+		ERBB2 AMP*	3+
Patient 3	P-0000716			ERBB2 AMP	2+	2.6	ERBB2 AMP*
Patient 4	YJ-egc-053	2+	10.1	ERBB2 T862A*
Patient 5	YJ-her-009	3+					ERBB2 AMP
Patient 6	NA	3+			3+
Patient 7	P-0005618	3+			3+		ERBB2 AMP*
Patient 8	YJ-her-008	1-2+	3.3	ERBB2 AMP	1-2+	3.8	ERBB2 AMP
Patient 9	YJ-her-005			ERBB2 AMP*			ERBB2 AMP
Patient 10	P-0003536	3+		ERBB2 AMP*	3+
Patient 11	YJ-her-013	3+		ERBB2 AMP*	3+		ERBB2 AMP*
Patient 12	YJ-her-004	3+		ERBB2 AMP*			ERBB2 AMP*
Patient 13	NA		3.9
Patient 14	P-0001495			ERBB2 AMP	3+
Patient 15	P-0009872	3+		ERBB2 AMP*	3+		ERBB2 AMP*
Patient 16	P-0004043	3+		ERBB2 AMP*			ERBB2 AMP*
Patient 17	NA	2+	3.7
Patient 18	YJ-her-003	3+		ERBB2 AMP*	3+		ERBB2 AMP*
Patient 19	P-0004116	3+			3+		ERBB2 AMP*
Patient 20	P-0004605	2+	4	ERBB2 AMP*	2+	3.2	ERBB2 AMP*
Patient 21	P-0009065			ERBB2 AMP	3+		ERBB2 AMP*
Patient 22	P-0000062	1+	2.9		2+	3.4	ERBB2 AMP*
Patient 23	P-0004680	3+		ERBB2 AMP*	3+		ERBB2 AMP*
Patient 24	YJ-egc-085		5.5				ERBB2 AMP
Patient 25	P-0002208			ERBB2 AMP			ERBB2 AMP
Patient 26	P-0000991	3+			3+		ERBB2 AMP*
Patient 27	P-0001158	3+		ERBB2 AMP*			ERBB2 AMP
Patient 28	P-0000282	3+		ERBB2 AMP*	3+
Patient 29	P-0006112			ERBB2 AMP	3+		ERBB2 AMP*
Patient 30	P-0000086			ERBB2 AMP	3+		ERBB2 AMP*
Patient 31	P-0000413	3+		ERBB2 AMP*	3+
Patient 32	YJ-her-006	3+		ERBB2 AMP*			ERBB2 AMP

## Sheet: Table S2. Treatment related Adv
Afatinib Cohort, n=20
Adverse event	Grade 2, n (%)	Grade 3, n(%)	Grade 4, n(%)
Activated partial thromboplastin time prolonged	1 (5)	0	0
Anemia	0	1 (5)	0
Anorexia	0	1 (5)	0
Dehydration	0	1 (5)	0
Diarrhea	6 (30)	0	0
Dry skin	1 (5)	0	0
Fatigue	1 (5)	0	0
Nausea	2 (6)	0	0
Papulopustular rash	1 (5)	0	0
Rash acneiform	2 (10)	0	0
Vomiting	2 (10)	0	0
Afatinib+Trastuzumab Cohort, n=12
Adverse event	Grade 2, n (%)	Grade 3, n(%)	Grade 4, n(%)
Creatinine increased	0	1 (8)	0
Dehydration	0	2 (17)	0
Diarrhea	8 (75)	0	0
Fatigue	1 (8)	2 (17)	0
Gastritis	1 (8)	0	0
Hypokalemia	1 (8)	2 (17)	0
Hypophosphatemia	0	1 (8)	0
Mucositis oral	1 (8)	0	0
Nausea	1 (8)	0	0
Paronychia	2 (17)	0	0
Rash acneiform	1 (8)	0	0
Rash maculo-papular	1 (8)	0	0
Vomiting	1 (8)	0	0

## Sheet: Table S3.  Master Patient Table
Manuscript_Sample_ID	Patient_ID	Sample_ID	Figure_1(A)	Figure_1(A+T)	Figure_2	Figure_3	Figure_4	Treatment Arm	Timepoint Trastuzumab (Pre/On/Post)	Timepoint Afatinib (Pre/On/Post)	Total Time on A (weeks)	% Change	Primary/Met	Biopsy site	time post start of A (weeks)
Patient 1	YJ-her-012	s_YJ_her_012_P2	YES	NO	NO	NO	NO	A	POST	PRE	1.6		primary	GE junction	0
Patient 2	P-0003983	P-0003983-T01-IM3	NO	YES	NO	NO	NO	A+T	PRE	PRE	6.7	182	primary	stomach	0
Patient 3	P-0000716	s_YJ_egc_040_M1	YES	NO	NO	NO	NO	A	POST	PRE	9	97	met	liver	0
Patient 4	YJ-egc-053	s_YJ_egc_053_P	YES	NO	NO	NO	NO	A	PRE	PRE	6	87	primary	GE junction	0
Patient 5	YJ-her-009	s_YJ_her_009_M1	YES	NO	NO	NO	NO	A	POST	ON	15.9	50	met	lymph node	0
Patient 6	NA	NA	NA	NA	NA	NA	NA	NA	NA	NA	2.7	49	NA	NA	NA
Patient 7	P-0005618	P-0005618-T02-IM5	NO	YES	NO	NO	NO	A+T	POST	PRE	5.1	45	primary	esophagus	0
Patient 8	YJ-her-008	s_YJ_her_008_M	YES	NO	NO	NO	NO	A	POST	PRE	7.9	42	met	liver	0
Patient 9	YJ-her-005	YJ-her-005-P2	YES	NO	NO	NO	NO	A	POST	PRE	7.3	40	primary	GE junction	0
Patient 10	P-0003536	P-0003536-T01-IM5	NO	YES	NO	NO	NO	A+T	PRE	PRE	9	34	met	lung	0
Patient 11	YJ-her-013	s_YJ_her_013_X2	YES	NO	NO	NO	NO	A	POST	PRE	7.7	32	met	liver	0
Patient 12	YJ-her-004	YJ-her-004-M1a	YES	NO	NO	NO	NO	A	POST	ON	7.3	31	met	liver	1.29
Patient 13	NA	NA	NA	NA	NA	NA	NA	NA	NA	NA	6.3	28	NA	NA	NA
Patient 14	P-0001495	P-0001495-T02-IM5	NO	YES	NO	NO	NO	A+T	POST	PRE	7.9	27	primary	esophagus	0
Patient 15	P-0009872	P-0009872-T02-IM5	NO	YES	NO	NO	NO	A+T	POST	PRE	9	21.4	met	lung	0
Patient 16	P-0004043	s_YJ_egc_037_X	YES	NO	NO	NO	NO	A	POST	PRE	8	21	met	left adrenal	0
Patient 17	NA	NA	NA	NA	NA	NA	NA	NA	NA	NA	6	15	NA	NA	NA
Patient 18	YJ-her-003	YJ-her-003-P3	YES	NO	NO	NO	NO	A	POST	PRE	19	9	met	umbilical nodule	0
Patient 19	P-0004116	P-0004116-T01-IM5	NO	YES	NO	NO	NO	A+T	POST	PRE	8	8.5	primary	GE junction	0
Patient 20	P-0004605	P-0004605-T02-IM5	NO	YES	NO	NO	NO	A+T	POST	PRE	12	2.4	met	lung	0
Patient 21	P-0009065	P-0009065-T02-IM5	NO	YES	NO	NO	NO	A+T	POST	PRE	16.9	-2.7	primary	stomach	0
Patient 22	P-0000062	P-0000062-T01-IM3	YES	NO	NO	NO	NO	A	POST	PRE	21	-6	primary	GE junction	0
Patient 23	P-0004680	P-0004680-T01-IM5	NO	YES	NO	NO	NO	A+T	ON	PRE	17	-7	met	liver	0
Patient 24	YJ-egc-085	s_YJ_egc_085_M	YES	NO	NO	NO	NO	A	POST	ON	15.3	-9	met	liver	1.86
Patient 25	P-0002208	P-0002208-T01-IM3	NO	YES	NO	NO	NO	A+T	POST	PRE	14.6	-11.3	primary	GE junction	0
Patient 26	P-0000991	P-0000991-T01-IM3	YES	NO	NO	NO	NO	A	POST	PRE	14	-13	met	lung	0
Patient 27	P-0001158	YJ-her-007-M1	YES	NO	NO	NO	NO	A	POST	PRE	15.9	-14	met	liver	0
Patient 28.1	P-0000282	P-0000282-T01-IM3	NO	YES	NO	NO	YES	A+T	PRE	PRE	31	-22	primary	stomach	0
Patient 28.2	P-0000282	YJ-egc-088-X2	NO	NO	NO	NO	YES	A+T	ON	ON	31	-22	primary	stomach	1.29
Patient 28.3	P-0000282	P-0000282-T02-IM5	NO	NO	NO	NO	YES	A+T	POST	POST	31	-22	met	ovary	19.43
Patient 28.4	P-0000282	YJ-egc-088-P1	NO	NO	NO	NO	YES	A+T	POST	POST	31	-22	primary	stomach	45.86
Patient 28.5	P-0000282	YJ-egc-088-M1	NO	NO	NO	NO	YES	A+T	POST	POST	31	-22	met	peritoneal	45.86
Patient 28.6	P-0000282	YJ-egc-088-M2	NO	NO	NO	NO	YES	A+T	POST	POST	31	-22	met	perirectal	45.86
Patient 29	P-0006112	P-0006112-T01-IM5	NO	YES	NO	NO	NO	A+T	POST	PRE	25.7	-34	primary	stomach	0
Patient 30.1	P-0000086	YJ-egc-049-P2	NO	NO	YES	NO	NO	A	PRE	PRE	15.9	-37	primary	GE junction	0
Patient 30.2	P-0000086	P-0000086-T01-IM3	NO	NO	YES	NO	NO	A	PRE	PRE	15.9	-37	met	liver segment 2	0
Patient 30.3	P-0000086	s_YJ_egc_049_X3	YES	NO	YES	NO	NO	A	POST	PRE	15.9	-37	met	liver segment 2	0
Patient 30.4	P-0000086	YJ-egc-049-P	NO	NO	YES	NO	NO	A	POST	POST	15.9	-37	primary	GE junction	26
Patient 30.5	P-0000086	YJ-egc-049-M1	NO	NO	YES	NO	NO	A	POST	POST	15.9	-37	met	liver segment 7/8	26
Patient 30.6	P-0000086	YJ-egc-049-M2	NO	NO	YES	NO	NO	A	POST	POST	15.9	-37	met	liver segment 2	26
Patient 30.7	P-0000086	YJ-egc-049-M3	NO	NO	YES	NO	NO	A	POST	POST	15.9	-37	met	liver segment 3	26
Patient 31.1	P-0000413	s_YJ_egc_036_P	YES	NO	NO	YES	NO	A	PRE	PRE	12	-43	primary	GE junction	0
Patient 31.2	P-0000413	YJ-egc-036-X	NO	NO	NO	YES	NO	A	POST	POST	12	-43	met	liver	16
Patient 31.3	P-0000413	YJ-egc-036-P2	NO	NO	NO	YES	NO	A	POST	POST	12	-43	primary	GE junction	18.57
Patient 31.4	P-0000413	YJ-egc-036-M1	NO	NO	NO	YES	NO	A	POST	POST	12	-43	met	liver	18.57
Patient 31.5	P-0000413	YJ-egc-036-M2	NO	NO	NO	YES	NO	A	POST	POST	12	-43	met	liver	18.57
Patient 31.6	P-0000413	YJ-egc-036-M3	NO	NO	NO	YES	NO	A	POST	POST	12	-43	met	liver	18.57
Patient 31.7	P-0000413	YJ-egc-036-M4	NO	NO	NO	YES	NO	A	POST	POST	12	-43	met	liver	18.57
Patient 31.8	P-0000413	YJ-egc-036-M8	NO	NO	NO	YES	NO	A	POST	POST	12	-43	met	pancreas	18.57
Patient 31.9	P-0000413	YJ-egc-036-M6	NO	NO	NO	YES	NO	A	POST	POST	12	-43	met	mesenteric	18.57
Patient 31.10	P-0000413	YJ-egc-036-M5	NO	NO	NO	YES	NO	A	POST	POST	12	-43	met	lymph node	18.57
Patient 31.11	P-0000413	YJ-egc-036-M7	NO	NO	NO	YES	NO	A	POST	POST	12	-43	met	lung	18.57
Patient 32	YJ-her-006	YJ-her-006-P2a	YES	NO	NO	NO	NO	A	POST	PRE	63.6	-75	primary	esophagus	0

## Sheet: Table S4. Baseline patient char
		Afatinib	Afatinib/Trastuzumab
		N=20	N=12
Gender
	Male	14 (70%)	10 (83%)
	Female	6 (30%)	2 (17%)
	Median age, range	63 (41-80)	59 (41-78)
Location
	Gastric	9 (45%)	4 (33%)
	GE Junction	3 (15%)	4 (33%)
	Esophageal	8 (40%)	4 (33%)
Race
	American Indian/Alaska Native	0 (0%)	0 (0%)
	Asian	0 (0%)	0 (0%)
	Black/African American	2 (10%)	2 (17%)
	White	17 (85%)	10 (83%)
	Other	1 (5%)	0 (0%)
Karnofsky Performance Status
	≥90%	2 (10%)	7 (58%)
	0.8	18 (90%)	5 (42%)
Median time since diagnosis, months (range)		16.7 (7.4-42.1)	20.7 (7.6-31.0)
Median duration of first-line trastuzumab treatment, months (range)		8.5 (1.4-27.07)	14.9 (6.4-29.77)
Trastuzumab in ≥2 lines of therapy		14 (70%)	3 (25%)
Prior chemotherapy/trastuzumab regimens Median, range		2.1 (1-5)	1.7 (1-5)
HER2 status after trastuzumab progression
	IHC 3+	6	10
	IHC 2+/FISH>2.0	3	1
	ERBB2 amplified based on NGS only	15	8
	Unknown*	3	0
	*HER2-positive on testing pre-trastuzumab, post progression sample non-diagnostic
Biomarker and imaging studies
	89Zr-PET	1	7
	Mass spectrometry	5	3
	Rapid autopsy	2	1
	cfDNA	0	1

## Sheet: Table S5. Treatment details
Manuscript_Sample_ID	Patient	Sample_ID	Received Treatment after A/A+T POD? (YES/NO)	Anti-HER2 treatment? (YES/NO/NA)	Post-POD tx notes	Lines of therapy prior to A/A+T	Therapy #1 (type)	Therapy #1 (days)	Therapy #2 (type)	Therapy #2 (days)	Therapy #3 (type)	Therapy #3 (days)	Therapy #4 (type)	Therapy #4 (days)	Therapy #5 (type)
Patient 1	YJ-her-012	s_YJ_her_012_P2	YES	YES	tras+irino+carbo	2	TWO DRUG+BIOLOGIC	106	THREE DRUG	77	A/A+T
Patient 2	P-0003983	P-0003983-T01-IM3	YES	YES	FOLFOX+TRAS	1	THREE DRUG+BIOLOGIC	893	A/A+T
Patient 3	P-0000716	s_YJ_egc_040_M1	UNKNOWN	UNKNOWN		1	TWO DRUG+BIOLOGIC	212	A/A+T
Patient 4	YJ-egc-053	s_YJ_egc_053_P	NO	NA		2	TWO DRUG+BIOLOGIC	406	TRAS+CARBO+IRINO	7	A/A+T
Patient 5	YJ-her-009	s_YJ_her_009_M1	YES	YES	tras+irino+carbo; FOLFOX+TRAS; FOLFIRI; CAPE	2	THREE DRUG+BIOLOGIC	390	sorafenib	301	A/A+T
Patient 6	NA		YES	YES	tras+irino+carbo	1	TWO DRUG+BIOLOGIC	192	A/A+T
Patient 7	P-0005618	P-0005618-T02-IM5	YES	NO	ram+paclitaxel (lost to follow up, unknown if patient received any additional treatments)	1	TWO DRUG+BIOLOGIC	192	A/A+T
Patient 8	YJ-her-008	s_YJ_her_008_M	NO	NA		1	TWO DRUG+BIOLOGIC	177	A/A+T
Patient 9	YJ-her-005	YJ-her-005-P2	YES	YES	tras+irino+cis	1	THREE DRUG+BIOLOGIC	168	A/A+T
Patient 10	P-0003536	P-0003536-T01-IM5	YES	NO	ram+paclitaxel	1	TWO DRUG+BIOLOGIC	263	A/A+T
Patient 11	YJ-her-013	s_YJ_her_013_X2	UNKNOWN	UNKNOWN		2	TWO DRUG+BIOLOGIC	111	EPIRUBICIN+OXALI	NA	A/A+T
Patient 12	YJ-her-004	YJ-her-004-M1a	NO	NA		1	THREE DRUG+BIOLOGIC	198	A/A+T
Patient 13	NA		YES	NO	brain RT	2	TRAS+GEM	365	TRAS+PACLITAXEL	129	A/A+T
Patient 14	P-0001495	P-0001495-T02-IM5	YES	NO	FOLFIRI	4	THREE DRUG+BIOLOGIC	420	MEDI4736	47	ram+carbo+irino	49	FOLFOX+tras+PERTUZUMAB	231	A/A+T
Patient 15	P-0009872	P-0009872-T02-IM5	YES	NO	irino; pembro	1	TWO DRUG+BIOLOGIC	265	A/A+T
Patient 16	P-0004043	s_YJ_egc_037_X	YES	YES	tras+paclitaxel; MEDI4736; carbo+irino	1	TWO DRUG+BIOLOGIC	341	A/A+T
Patient 17	NA		YES	YES	FOLFOX+TRAS	3	THREE DRUG+BIOLOGIC	96	TRAS+DOCE+IRINO	99	TRAS+CIS+IRINO	140	A/A+T
Patient 18	YJ-her-003	YJ-her-003-P3	YES	YES	tras+irino+carbo	1	TWO DRUG+BIOLOGIC	222	A/A+T
Patient 19	P-0004116	P-0004116-T01-IM5	YES	YES	5-fu+GEM+TRAS; ram+paclitaxel	1	TWO DRUG+BIOLOGIC	767	A/A+T
Patient 20	P-0004605	P-0004605-T02-IM5	YES	YES	cis+irino; ram+irino+carbo; DS-8201a (IRB# 16-1598); pembro	1	THREE DRUG+BIOLOGIC	300	A/A+T
Patient 21	P-0009065	P-0009065-T02-IM5	YES	NO	irino; paclitaxel	1	TWO DRUG+BIOLOGIC	599	A/A+T
Patient 22	P-0000062	P-0000062-T01-IM3	YES	YES	tras+doce; nivolumab	3	TWO DRUG+BIOLOGIC	812	TWO DRUG+BIOLOGIC	304	tras+carbo+irino	37	A/A+T
Patient 23	P-0004680	P-0004680-T01-IM5	YES	YES	tras+paclitaxel	1	TWO DRUG+BIOLOGIC	252	A/A+T
Patient 24	YJ-egc-085	s_YJ_egc_085_M	NO	NA		3	TWO DRUG+BIOLOGIC	175	tras+irino	84	tras+paclitaxel	70	A/A+T
Patient 25	P-0002208	P-0002208-T01-IM3	YES	YES	FOLFOX+TRAS; ram+irino; 5-fu+gem+tras; pertuzumab+tras+paclitaxel	3	TWO DRUG+BIOLOGIC	470	tras+carbo+paclitaxel	120	chemo+RT	60	A/A+T
Patient 26	P-0000991	P-0000991-T01-IM3	NO	NA		2	TWO DRUG+BIOLOGIC	690	TWO DRUG+BIOLOGIC	151	A/A+T
Patient 27	P-0001158	YJ-her-007-M1	YES	YES	5-FU+DOCE+TRAS; tras+irino+carbo; ram	1	TWO DRUG+BIOLOGIC	168	A/A+T
Patient 28	P-0000282	P-0000282-T01-IM3	YES	YES	afatinib+cabozantinib; tras+paclitaxel;	1	TWO DRUG+BIOLOGIC	699	A/A+T
Patient 29	P-0006112	P-0006112-T01-IM5	UNKNOWN	UNKNOWN		4	TWO DRUG+BIOLOGIC	236	THREE DRUG	248	tras+taxol+MM-111	150	tras+irino	165	A/A+T
Patient 30	P-0000086	s_YJ_egc_049_X3	YES	NO	RAM	2	TWO DRUG+BIOLOGIC	229	FOLFIRI+tras	39	A/A+T
Patient 31	P-0000413	s_YJ_egc_036_P	YES	YES	FOLFOX+TRAS	1	TWO DRUG+BIOLOGIC	260	A/A+T
Patient 32	YJ-her-006	YJ-her-006-P2a	NO	NA		3	THREE DRUG	565	tras+irino+cis	24	tras+irino+carbo	301	A/A+T

## Sheet: Table S6.  Detailed CN fc
Manuscript_Sample_ID	Patient_ID	Sample_ID	EGFR fc	HER2 fc	RECIST
Patient 1	YJ-her-012	s_YJ_her_012_P2	1.81	4.48	NA
Patient 2	P-0003983	P-0003983-T01-IM3	-1.03	2.31	182
Patient 3	P-0000716	s_YJ_egc_040_M1	1.39	2.7	97
Patient 4	YJ-egc-053	s_YJ_egc_053_P	1.53	1.72	87
Patient 5	YJ-her-009	s_YJ_her_009_M1	-1.07	16.56	50
Patient 7	P-0005618	P-0005618-T02-IM5	1	3.11	45
Patient 8	YJ-her-008	s_YJ_her_008_M	1.18	2.17	42
Patient 9	YJ-her-005	YJ-her-005-P2	11.03	3.28	40
Patient 10	P-0003536	P-0003536-T01-IM5	-1.04	5.64	34
Patient 11	YJ-her-013	s_YJ_her_013_X2	1.08	2.21	32
Patient 12	YJ-her-004	YJ-her-004-M1a	1.01	5.34	31
Patient 14	P-0001495	P-0001495-T02-IM5	-1.34	5.93	27
Patient 15	P-0009872	P-0009872-T02-IM5	-1.03	10.58	21.4
Patient 16	P-0004043	s_YJ_egc_037_X	1.18	12.22	21
Patient 18	YJ-her-003	YJ-her-003-P3	1.08	15.18	9
Patient 19	P-0004116	P-0004116-T01-IM5	1.21	15.87	8.5
Patient 20	P-0004605	P-0004605-T02-IM5	-1.09	3.46	2.4
Patient 21	P-0009065	P-0009065-T02-IM5	1.57	10.61	-2.7
Patient 22	P-0000062	P-0000062-T01-IM3	-1.06	3.1	-6
Patient 23	P-0004680	P-0004680-T01-IM5	1.13	5.17	-7
Patient 24	YJ-egc-085	s_YJ_egc_085_M	1.39	19.16	-9
Patient 25	P-0002208	P-0002208-T01-IM3	1.14	6.43	-11.3
Patient 26	P-0000991	P-0000991-T01-IM3	1.19	15.17	-13
Patient 27	P-0001158	YJ-her-007-M1	1.19	6.76	-14
Patient 28.1	P-0000282	P-0000282-T01-IM3	1.05	6.46	-22
Patient 29	P-0006112	P-0006112-T01-IM5	1.58	15.71	-34
Patient 30.3	P-0000086	s_YJ_egc_049_X3	49.3	31.41	-37
Patient 31.1	P-0000413	s_YJ_egc_036_P	26.68	2.73	-43
Patient 32	YJ-her-006	YJ-her-006-P2a	8.23	4.8	-75

## Sheet: Table S7.  89Zr-trastuzumab PET
ID_in_manuscript	Patient ID	RECIST 1.1 best response (% change in SLD)	Time on treatment in weeks	RECIST 1.1 target lesions on CT	Pre protocol therapy (SUV)	Within 3 to 5 weeks of initation of protocol therapy (SUV)		Highlighted cells indicate lesion with resolution of uptake to baseline SUV
Patient 30	P-0000086	-0.37	15.9	Paraesophageal lymphnode	9.1	3.03
				Liver Segment 2/3	16.4	15.86
				GE Junction mass	21.49	23.68
				Liver segment 7/8 (new at progression)	0	8.65
				Median SUV	12.75	12.255
				Max SUV	21.49	23.68
				Normal backgorund liver SUV	6.06	4.97
				Normal nodal mediastinal background SUV	2.65	2.34
Patient 25	P-0002208	-0.146	-14.6	Liver backround uptake in non-cancer tissue	7.39	7.37
				Liver Segment 4A	14.74	8.14
				Liver Segment 5	23.83	10.14
				Liver Segment 7	13.9	7.26
				GE Junction Mass	none	none
				Median SUV	14.74	7.755
				Max SUV	23.83	10.14
Patient 28	P-0000282	-0.22	31	Left Ovary	5.13	5.23
				Perigastric peritoneal metastasis	7.25	1.85
				Gastric mass	8.25	3.95
				Median SUV	7.25	4.59
				Max SUV	8.25	3.95
				Normal perigastric /gastric background SUV	2.46	2.15
				Normal periovarian tissue backround SUV	2.37	2.12
Patient 7	P-0005618	0.45	5.1	Liver segment 8	none	none
				Liver segment 6	none	none
				Retrocaval lymphnode	7.58	6.96
				Left para-aortic lymphnode	6.78	4.48
				Right common iliac lymphnode	7.23	5.16
				Left common iliac lymphnode	6.4	6.3
				Esophagus mass	6.68	4.63
				Median SUV	6.78	5.16
				Max SUV	7.58	6.96
				Normal abdodimal nodal background SUV	2.31	1.49
Patient 23	P-0004680	-0.07	17	Liver segment 4A	20.73	13.7
				Liver segment 6	none	none
				Liver segment 2	none	none
				Liver segment 1	none	none
				Liver segment 4B	20.02	14.5
				Liver segment 8	17.01	12.06
				Periceliac lymph node	10.38	10.1
				Portacaval lymph node	11.06	9.3
				Retrocaval lymph node	12.21	8.1
				Interaortocaval lymph node	7.78	7.4
				GE Junction mass
				Right lung metastatis	3.86	1.6
				Median SUV	11.635	9.7
				Max SUV	20.73	14.5
				Normal liver backround SUV	12.19	10.8
Patient 14	P-0001495	0.27	7.9	Liver segment 5/6	12.51	13.31
				Liver segment 4	12.12	13.17
				Right paraesophageal LN	none	none
				Right gastrohepatic LN	none	none
				Portacaval LN
				Omental implant	3.26	3.89
				Sigmoid implant	4.7	5.24
				GE junction mass	10.31	12.27
				Right paracolic implant	4.69	4.05
				Median SUV	7.505	8.755
				Max SUV	12.51	12.27
				Normal nodal/peritoneal background SUV	1.51	1.7
				Normal liver background SUV	9.38	8.37
Patient 10	P-0003536	0.34	9	Lung left upper lobe	6.39	9.2
				Lung left upper lobe	1.69	2.1
				Lung right apical	3.43	3.1
				Median SUV	3.43	3.1
				Max SUV	6.39	9.2
				Normal lung background SUV	0.81	1
Patient 21	P-0009065	-0.027	16.9	Left lung apex	none	none
				Left lung superior segment	none	none
				Lung right lower lobe	none	none
				GE junction mass	18.73	17.7
				Liver sement 4A	none	none
				Liver segment 7	none	none
				Liver segment 7/8	16.59	13.6
				Liver segment 8	none	none
				Normal liver	12.32	11.61
				Median SUV	17.66	15.65
				Max SUV	18.73	17.7
				Normal liver backround SUV	12.33	12.48

## Sheet: Table S8. SRM-MS analysis 
Patient 31
(P-0000413)	Liver Segment 8	EGFR (amol/µg)	HER2 (amol/µg)	cMet (amol/µg)
	On afatinib	10550	462.5	776.5
	Post afatinib progression autopsy sample	8360	748.5	2036.2
AUTOPSY DATA
		EGFR (amol/µg)	HER2 (amol/µg)	cMet (amol/µg)
	Liver section 2	6570	663	3914.3
	Liver section 6	8910	767.2	3253.7
	Liver section 4	14578.3	1544.2	9755
	Liver section 8	8360	748.5	2036.2
	GE junction mass	20728.3	1199.8	998
	Portacaval adenopathy	11731.7	603.8	1422
		22978.3	839.8	2530.8
	Peritoneal met	12208.3	888.7	1844.7
	Mesenteric met	11581.7	669	7485
	Lung nodule	28705	1170.7	1529
	Pancreas	9135	1239.2	3722.5
Patient 30	Liver Segment 2/3	EGFR (amol/µg)	HER2 (amol/µg)	cMet (amol/µg)
(P-0000086)	Pre-afatinib mass spec	8637.5	3181.5	580.8
	Post afatinib progression autopsy	216.4	2629.8	0
AUTOPSY DATA
		EGFR (amol/µg)	HER2 (amol/µg)	cMet (amol/µg)
	liver section 7-8	368.1	4360	ND
	liver section 2	216.4	2629.8	ND
	GE Junction	244.2	2361.2	ND
	GE Junction posterior	328.3	2817.5	ND
	Lymph node (1)	120.7	ND	ND
	Lymph node (2)	187.3	ND	ND
Additional cases with MS data
Patient ID	Time point	EGFR (amol/µg)	HER2 (amol/µg)	cMet (amol/µg)
Patient 3 (P-0000716)	1 week on afatinib	244.6	1115.2	297.1
Patient 7 (P-0005618)	1 week on afatinib	152	1764.2	603.3
Patient 9 (YJ-her-005)	1 week on afatinib	1644.8	554.3	444.1
Patient 27 (P-0001158)	Pre-afatinib	409.6	9350	442.9
Patient 23 (P-0004680)	Pre-afatinib	150.3	871.2	741.5
Patient 21 (P-0009065)	Pre-afatinib	221.9	1881	354.4

## Sheet: Table S9. Serial cfDNA  results
Patient ID	Sample ID	Time Point	ERBB2	MET	EGFR	CDK6
P-0000282	YJ-088-PL3	3 months on afatinib	3	3.1	Non reported	2.2
P-0000282	YJ-088-PL4	~1 week on afatinib 20 mg + cabozantinib 40mg	2.6	2.5	Non reported	Non reported
P-0000282	YJ-088-PL5	A+C on hold since due to c.diff/hospitalization	3.4	2.9	Non reported	Non reported
P-0000282	YJ-088-PL6	2 weeks after restart on afatinib 20 mg, cabozantinib 20 mg	2.1	2.3	Non reported	Non reported
P-0000282	YJ-088-PL7	in-patient; ~1 week prior to DOD	7.5	7.7	2.6	3

[truncated: 1 more sheets: Table S10. IMPACT Genes]
