# Supplementary material for: EGFR and MET Amplifications Determine Response to HER2 Inhibition in ERBB2 -Amplified Esophagogastric Cancer
Source: Oxford University Press journal article supplement (doi:10.1158/2159-8290.cd-18-0598), 2018-11-21
Supplement: 21598290cd180598-sup-198538_2_supp_5153314_phw5f3.docx [file 21598290cd180598-sup-198538_2_supp_5153314_phw5f3.docx]

**SUPPLEMENTARY FIGURE LEGENDS**

**Figure S1. Additional results for dual probe *EGFR* and *ERBB2* FISH from Patients 9, 30 and 32.** A representative image is shown for each of the pathology samples that were tested for each patient. Co-amplification of *EGFR* and *ERBB2* was detected in all tested samples. The table at the bottom of the figure provides additional details regarding the FISH results. DM, Double Minutes; HSR, Homogeneous Staining Region.

**Figure S2. CONSORT diagram.**
